# Supplementary material
Source: publisher site journal article supplement (https://www.spandidos-publications.com/4948/downloadSupplementary)

Figure S1. Relationship between CD8+ T-cell infiltration and disease-free survival [all studies included, also Catacchio *et al* (34) 2019(I)]. HR, hazard ratio; I, intratumoral; P, peritumoral.

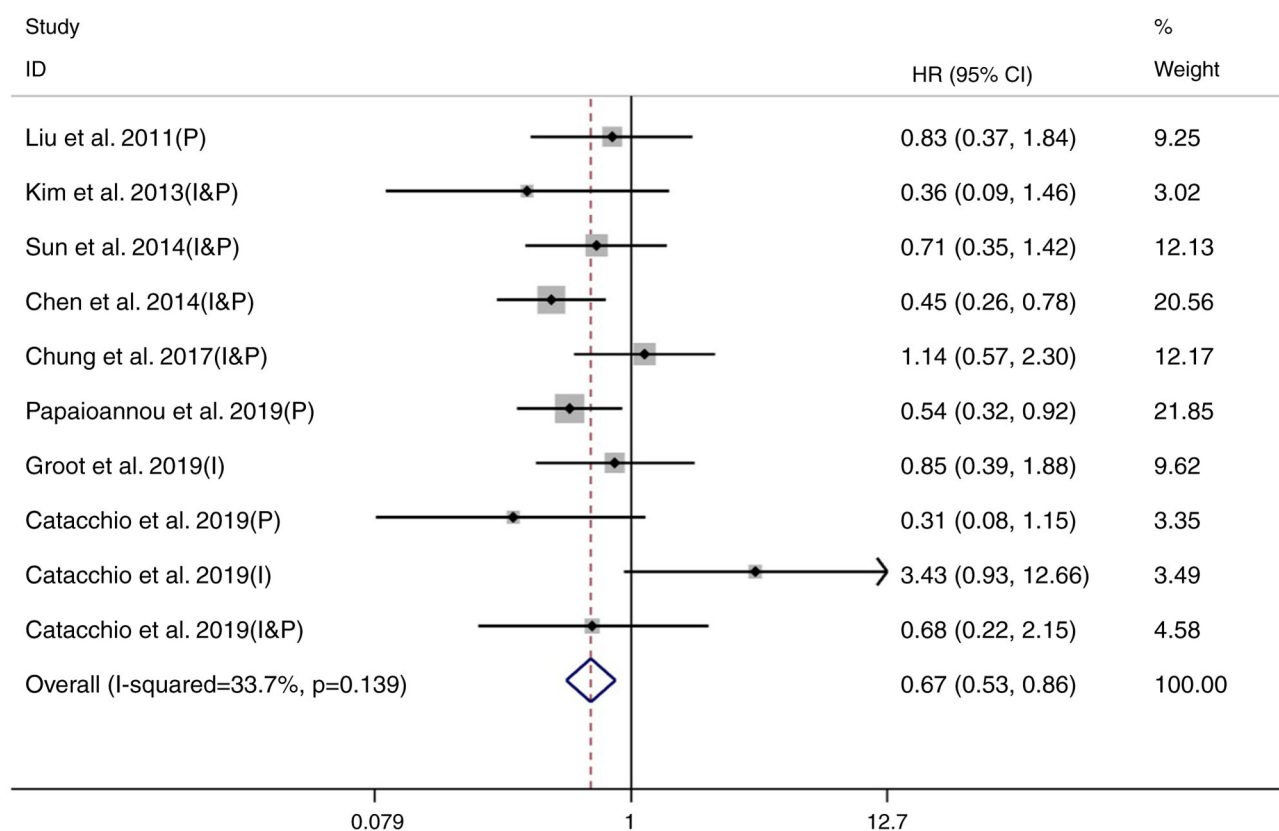

Figure S2. Sensitivity analysis of the relationship between CD8+ T-cell infiltration and disease-free survival [all studies included, also Catacchio *et al* (34) 2019(I)]. I, intratumoral; P, peritumoral.

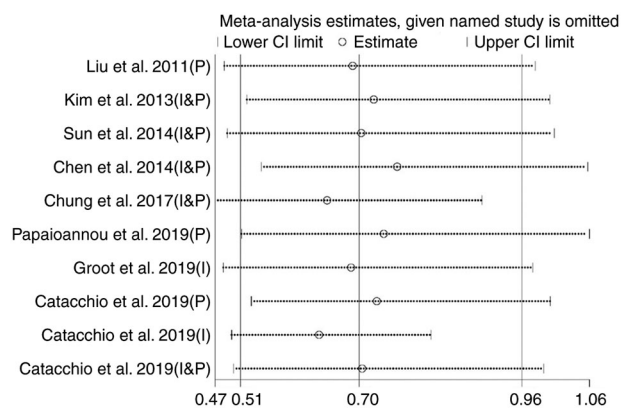

Figure S3. Sensitivity analysis of the relationship between CD8+ T-cell infiltration and disease-free survival [Catacchio *et al* (34) 2019(I) excluded]. I, intratumoral; P, peritumoral.

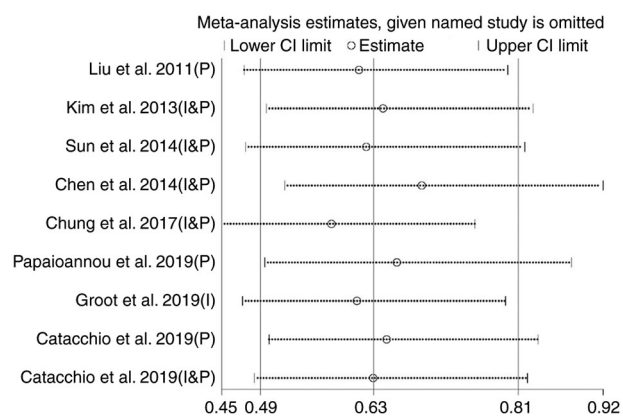

Supplement: Supplementary file 1 [file downloadSupplementary]
